# Supplementary material for: Compound C Inhibits B16-F1 Tumor Growth in a Syngeneic Mouse Model via the Blockage of Cell Cycle Progression and Angiogenesis
Source: Cancers (Basel). 2019 Jun 13;11(6):823. doi: 10.3390/cancers11060823 (PMC6627246; doi:10.3390/cancers11060823)
Supplement: Supplementary file 1 [file cancers-11-00823-s001.pdf]

# Supplementary Materials: Compound C Inhibits B16-F1 Tumor Growth in a Syngeneic Mouse Model Via the Blockage of Cell Cycle Progression and Angiogenesis

Yun Taek Lee, So Hyun Lim, Boram Lee, Insug Kang and Eui-Ju Yeo

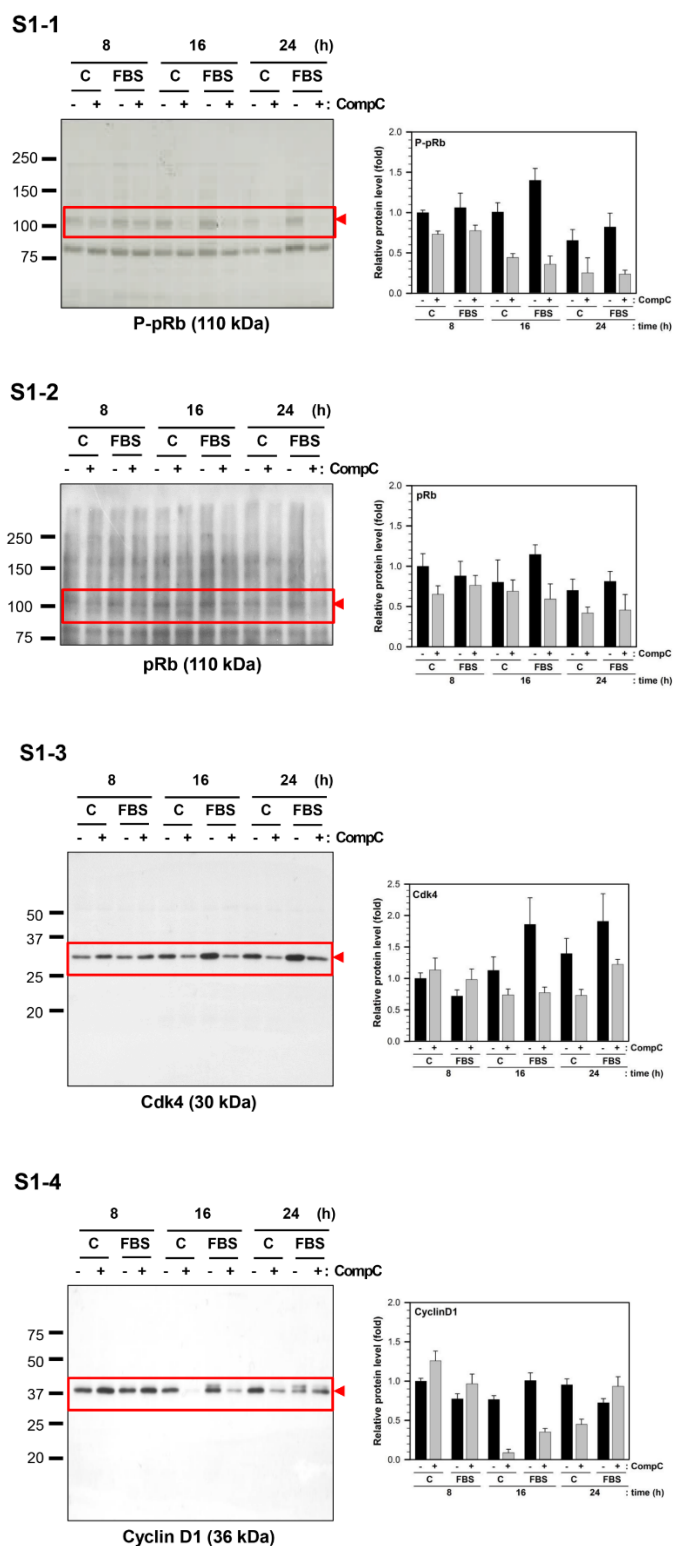

S1-5

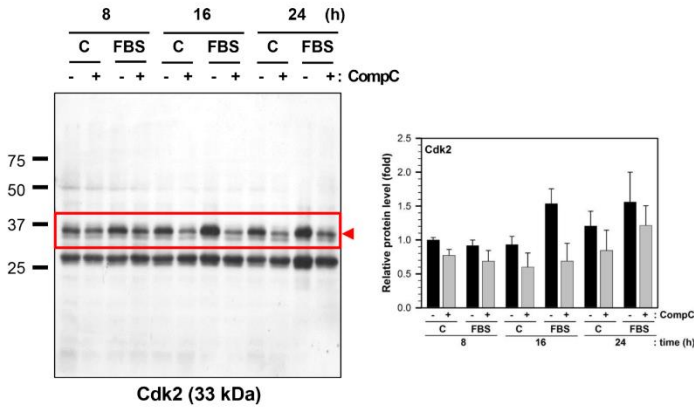

S1-6

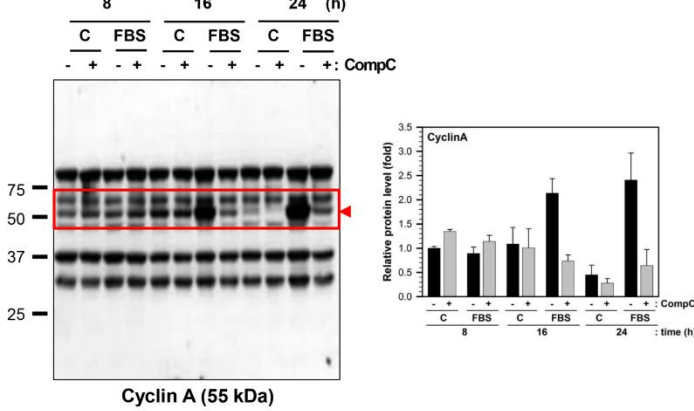

S1-7

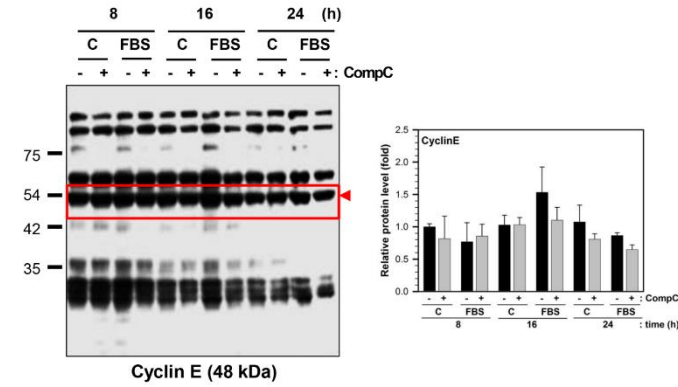

S1-8

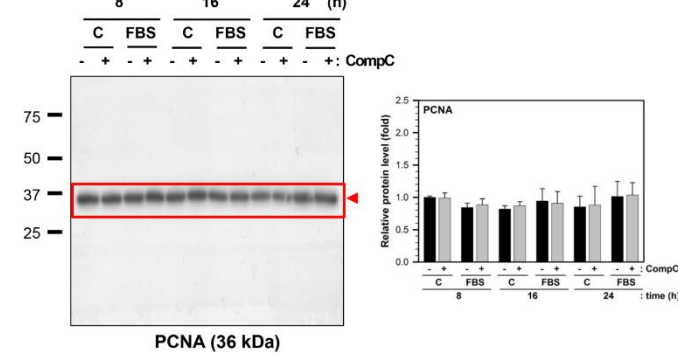

## S1-9

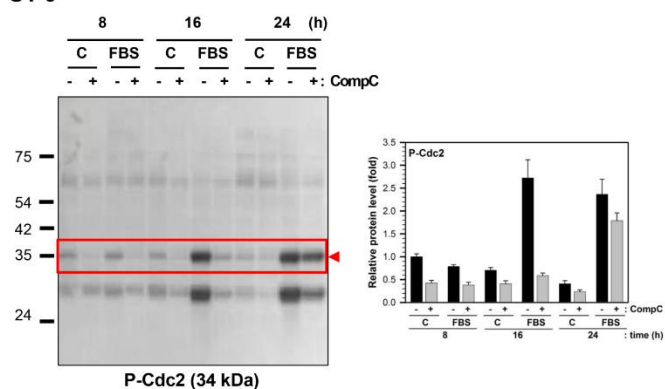

## S1-10

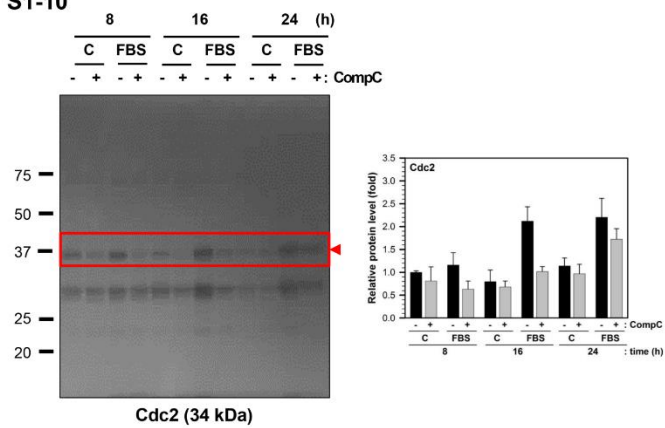

## S1-11

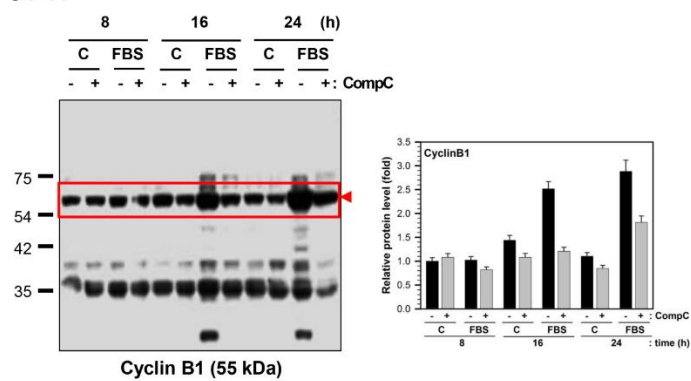

## S1-12

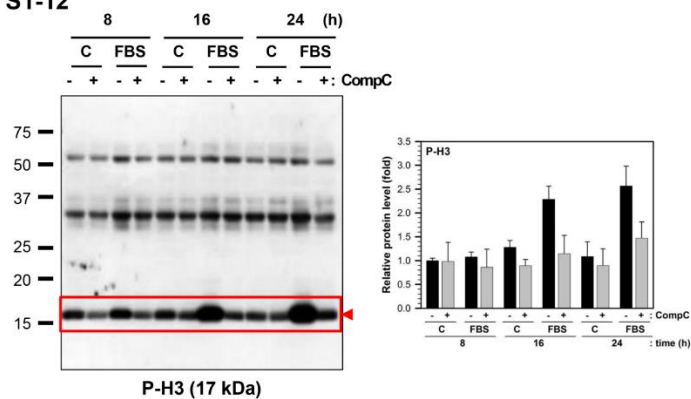

S1-13

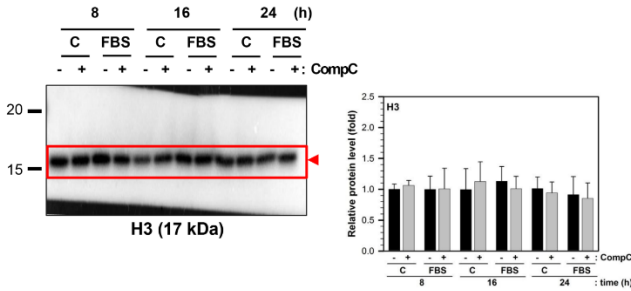

S1-14

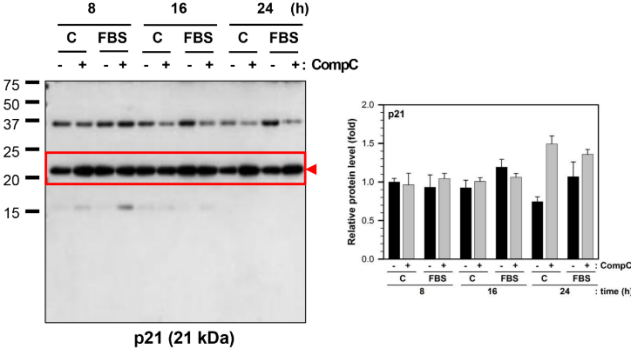

S1-15

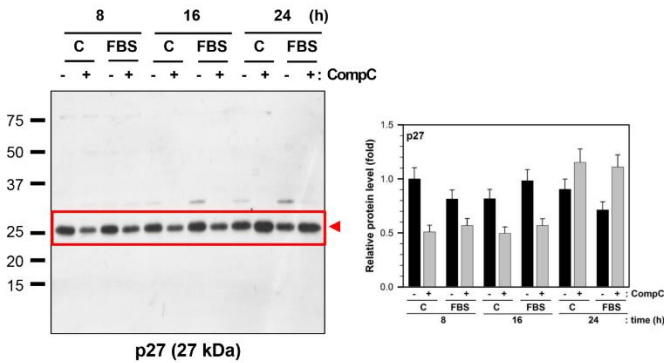

S1-16

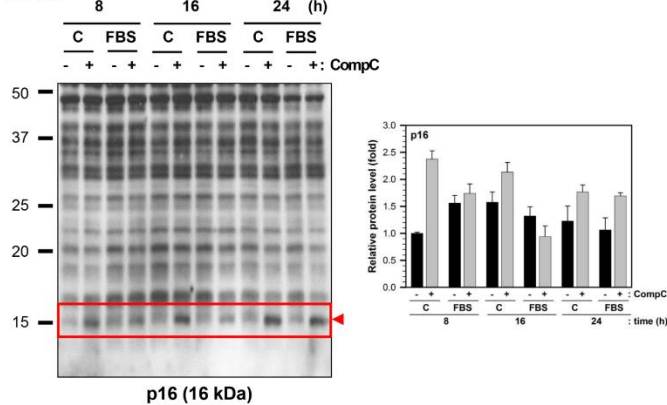

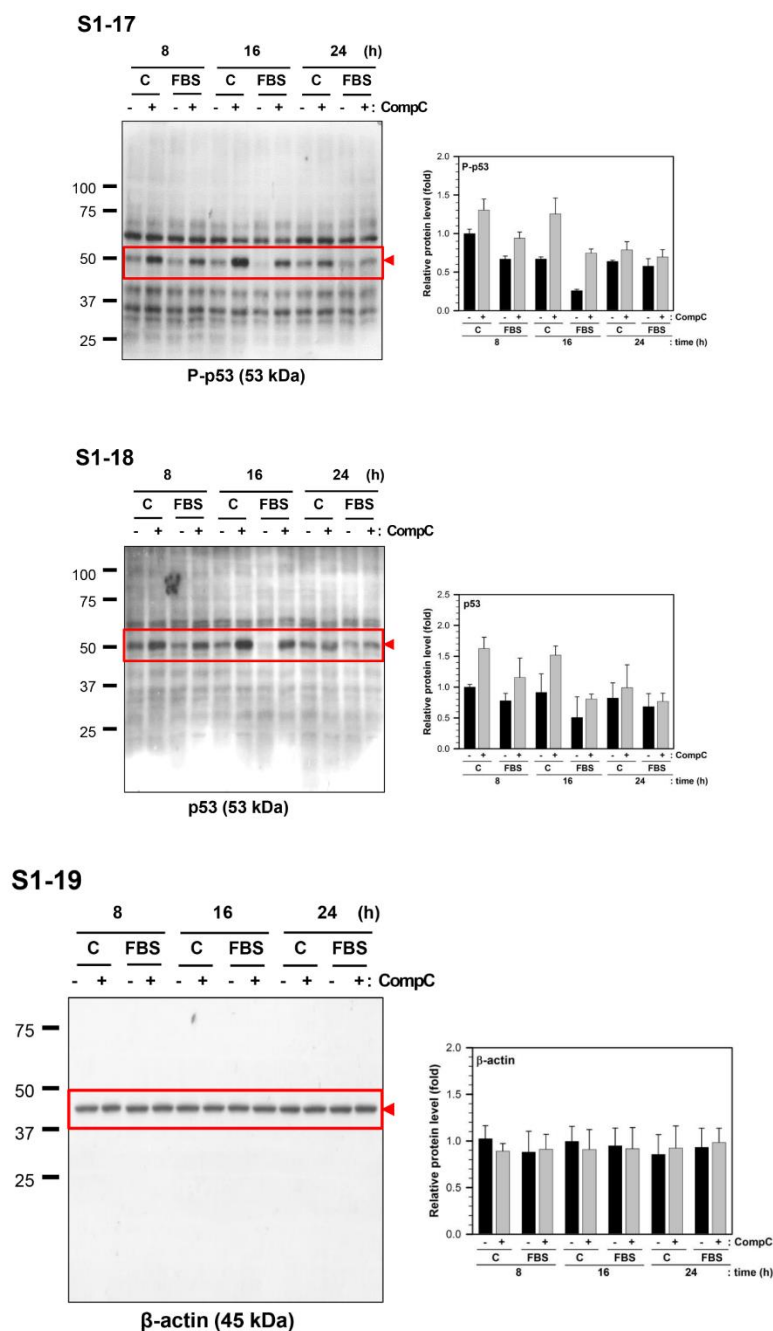

**Figure S1.** Quiescent cells were stimulated with 10% FBS for the indicated times (8, 16, and 24 h) in the presence of vehicle (–) or 10  $\mu$ M CompC (+). Cell lysates were analyzed by western blot analysis using antibodies against total and phosphorylated pRb (P-pRb), Cdks, cyclins, histone H3, Cdk inhibitors, and  $\beta$ -actin as an internal control. The band density of  $\beta$ -actin was used as a normalization control for densitometry analysis of each blot. A representative whole blot and a graph with error bars for western blot analysis of each protein are shown side by side. (supplementary data for Figure 2A,B)

## S2-1

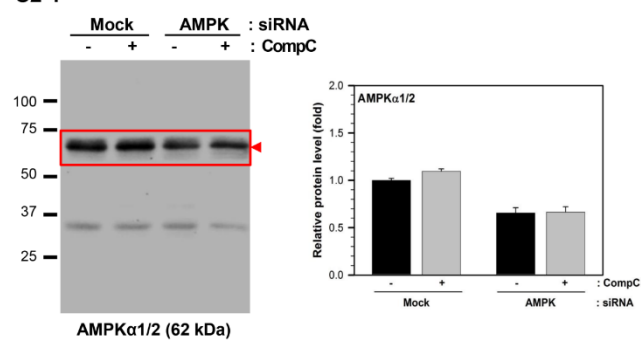

## S2-2

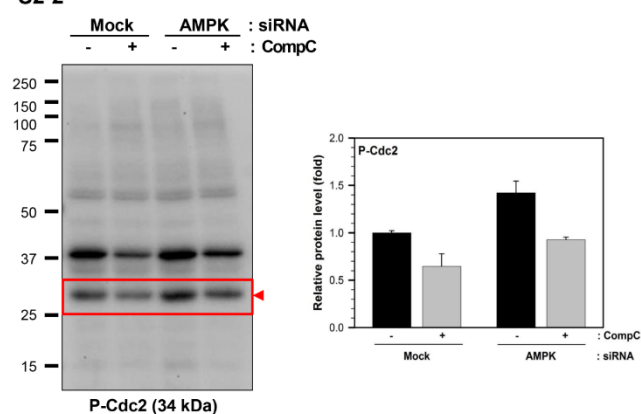

## S2-3

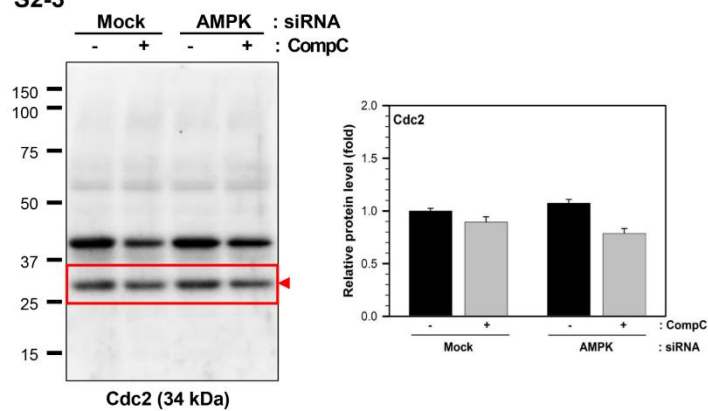

## S2-4

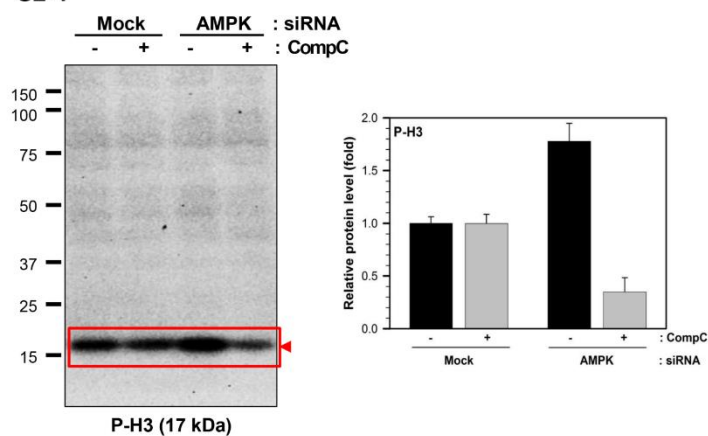

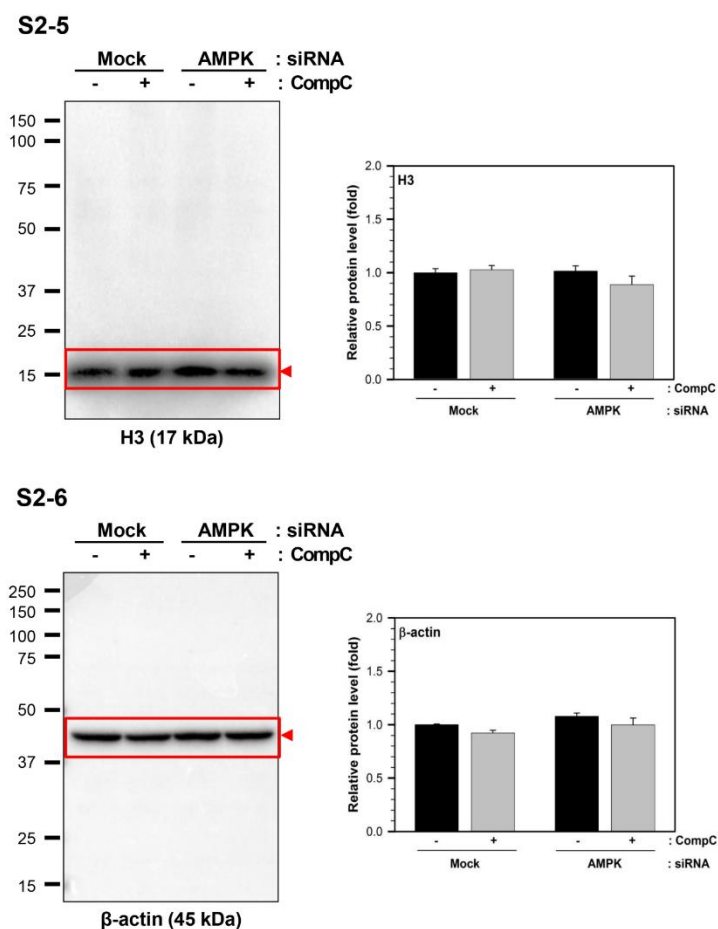

**Figure S2.** B16-F1 cells were transfected with mock or AMPK $\alpha$ 1/2 siRNA for 48 h and then stimulated with 10% FBS in the presence of vehicle (–) or 10  $\mu$ M CompC (+) for 16 h. Cell lysates were analyzed by western blot analysis using antibodies against AMPK $\alpha$ 1/2, total and phosphorylated Cdc2, histone H3, and  $\beta$ -actin. The band density of  $\beta$ -actin was used as a normalization control for densitometry analysis of each blot. A representative whole blot and a graph with error bars for western blot analysis of each protein are shown side by side. (supplementary data for Figure 2C)

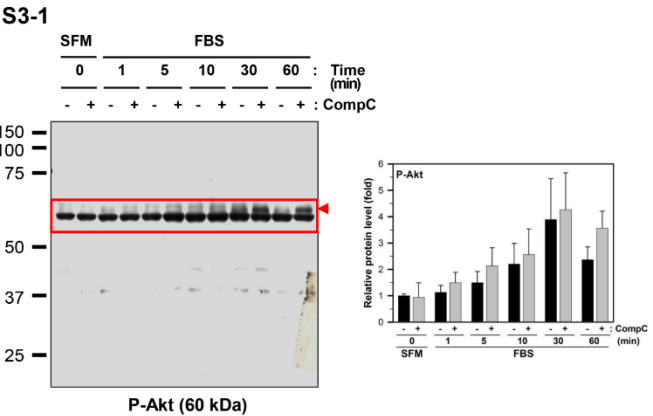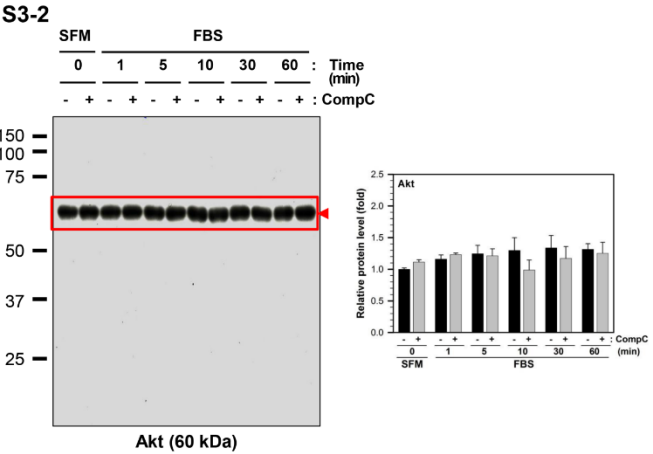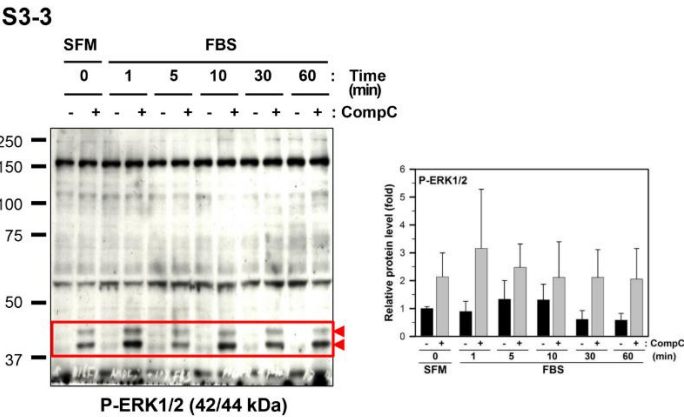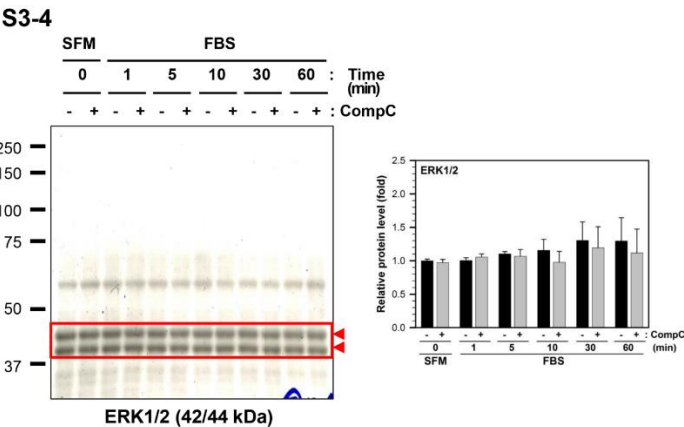

## S3-5

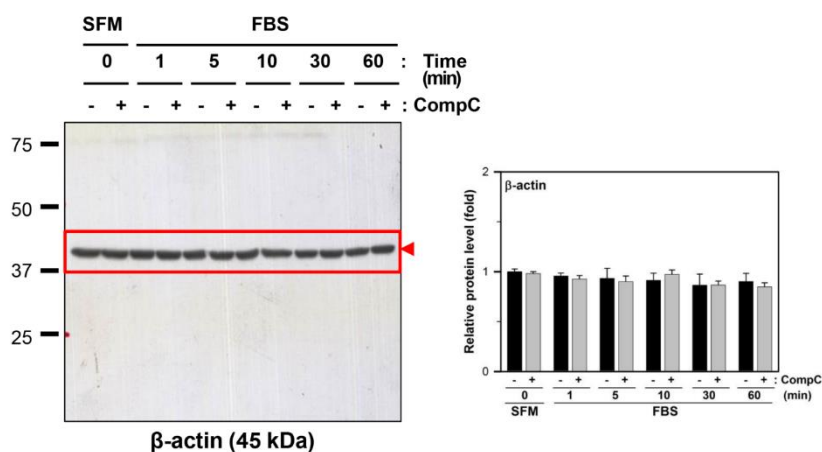

**Figure S3.** B16-F1 cells were stimulated with 10% FBS for the indicated times in the presence of vehicle or 10  $\mu$ M CompC. Cell lysates were analyzed by western blot analysis using antibodies against total and phosphorylated Akt (P-Akt) and ERK1/2 (P-ERK1/2), and  $\beta$ -actin. The band density of  $\beta$ -actin was used as a normalization control for densitometry analysis of each blot. A representative whole blot and a graph with error bars for western blot analysis of each protein are shown side by side. (supplementary data for Figure 3A)

## S4-1

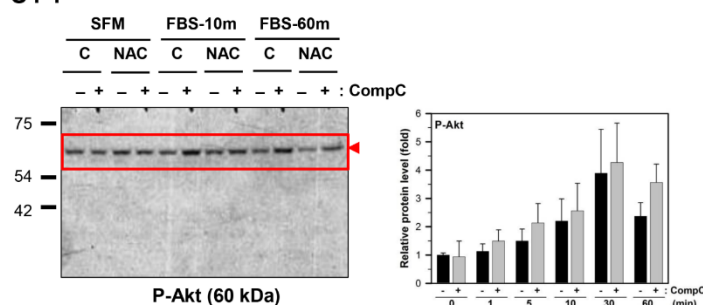

## S4-2

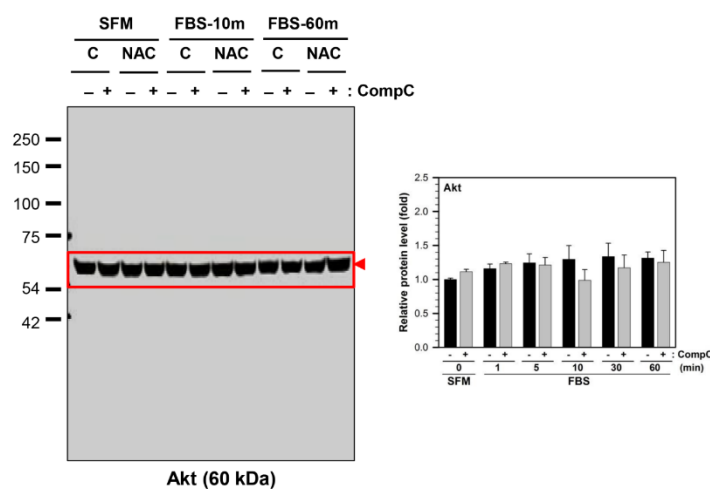

## S4-3

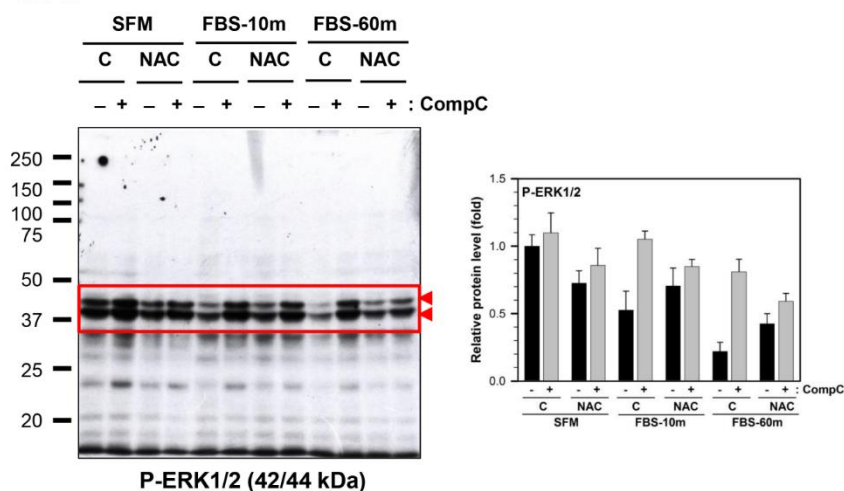

## S4-4

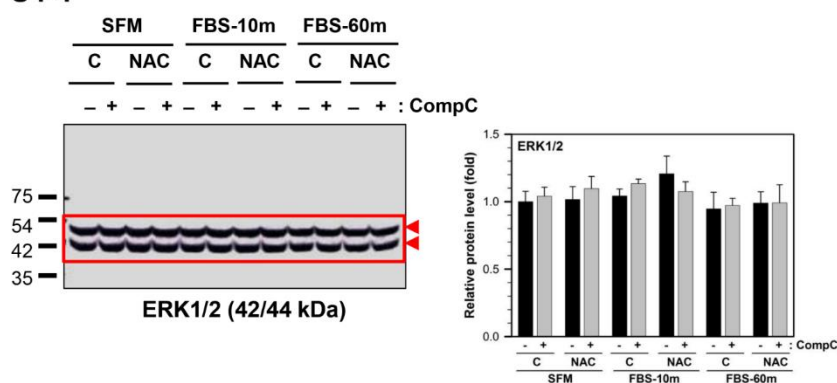

## S4-5

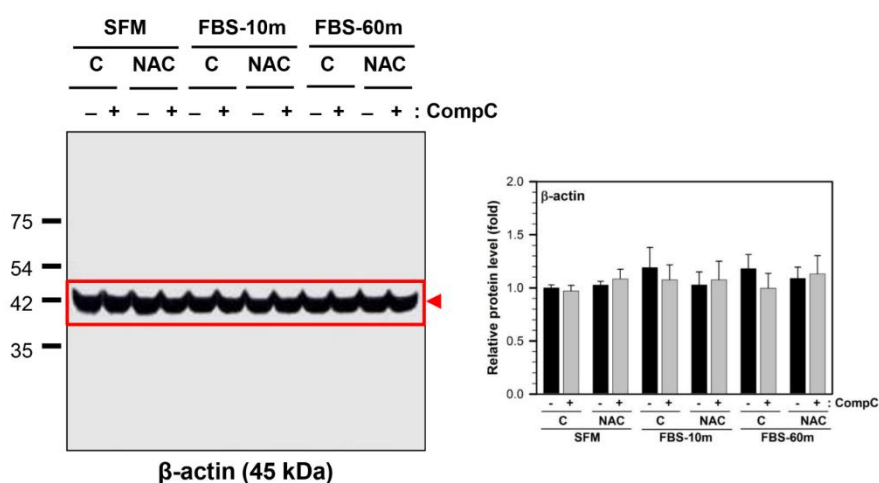

**Figure S4.** B16-F1 cells were serum-starved by incubation with SFM for 24 h. Cells were pretreated with vehicle alone, 5 mM NAC and/or 10  $\mu$ M CompC for 1 h. Cells were then stimulated with FBS for 10 and 60 min. Cell lysates were analyzed by western blot analysis using antibodies against total and phosphorylated Akt (P-Akt) and ERK1/2 (P-ERK1/2), and  $\beta$ -actin. The band density of  $\beta$ -actin was used as a normalization control for densitometry analysis of each blot. A representative whole blot and a graph with error bars for western blot analysis of each protein are shown side by side. (supplementary data for Figure 3B)

## S5-1

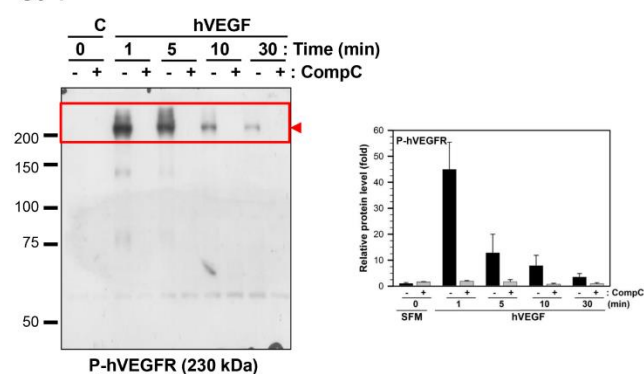

## S5-2

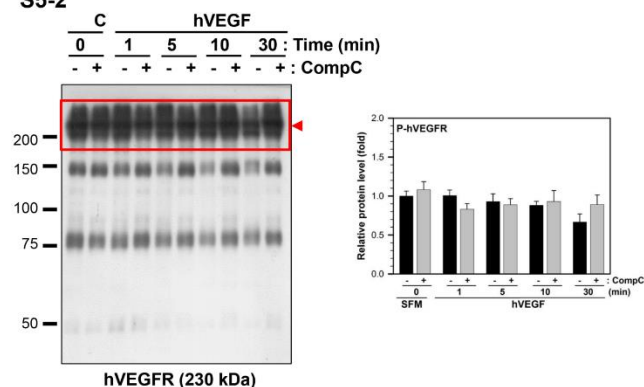

## S5-3

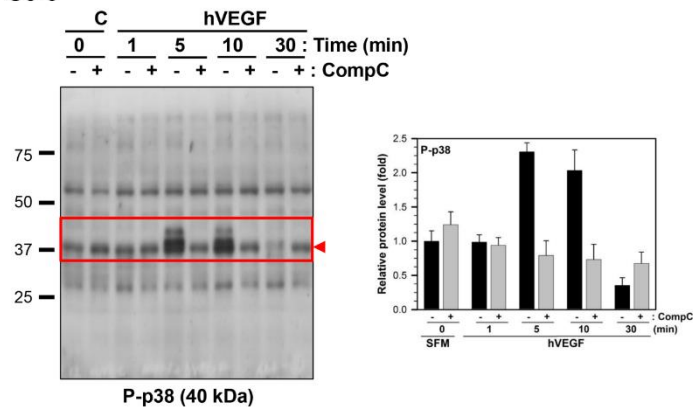

## S5-4

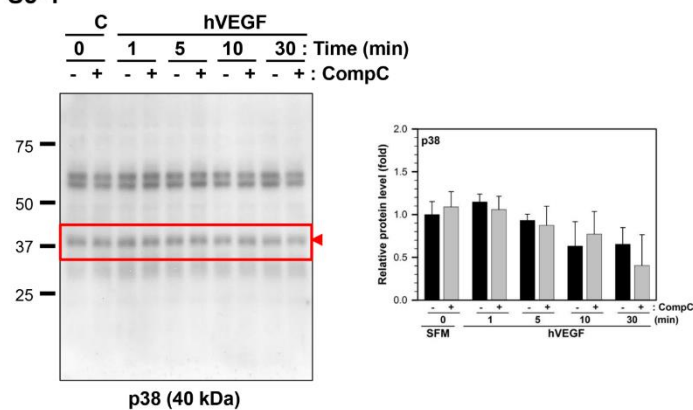

## S5-5

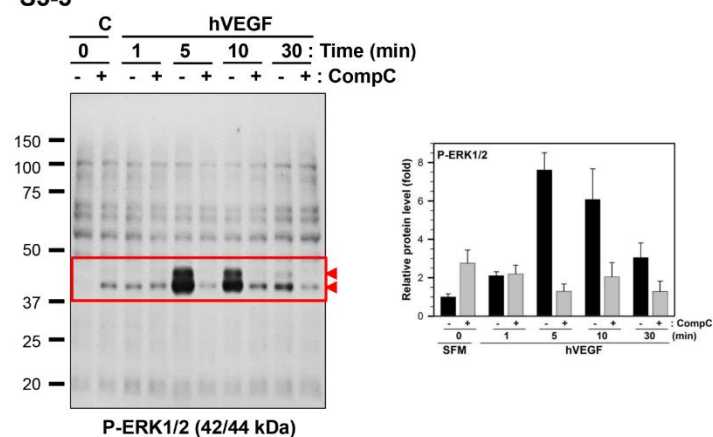

## S5-6

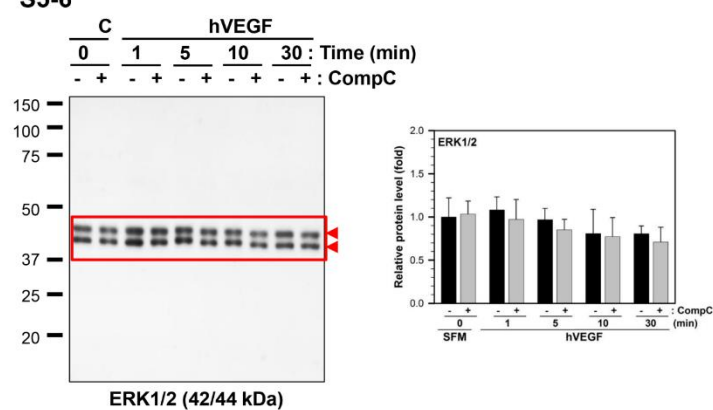

## S5-7

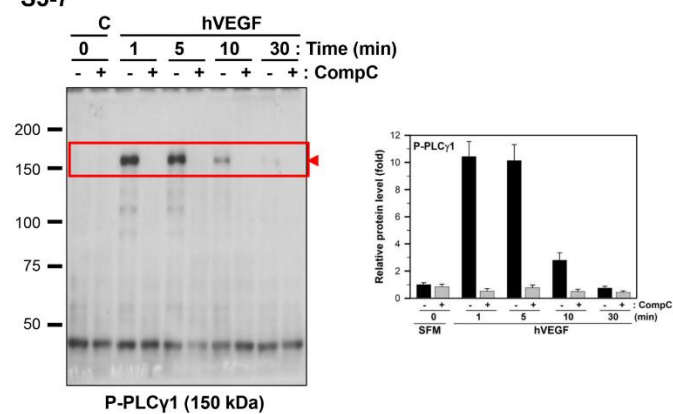

## S5-8

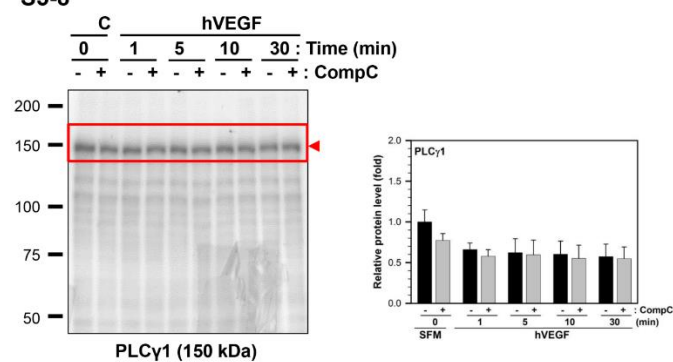

## S5-9

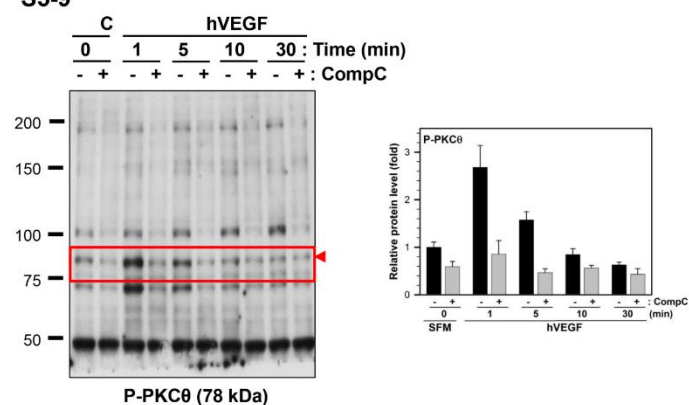

## S5-10

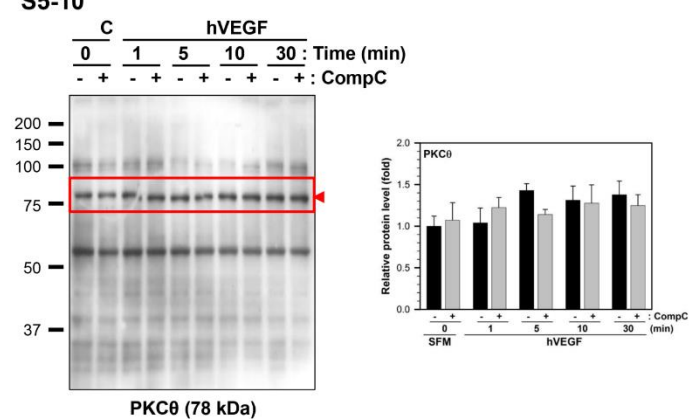

## S5-11

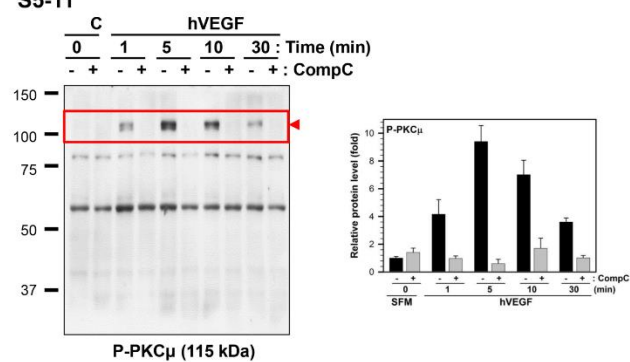

## S5-12

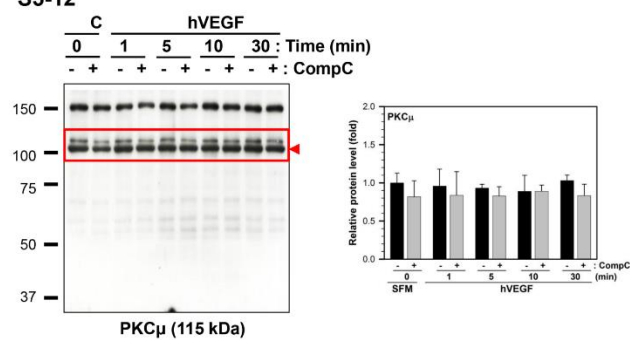

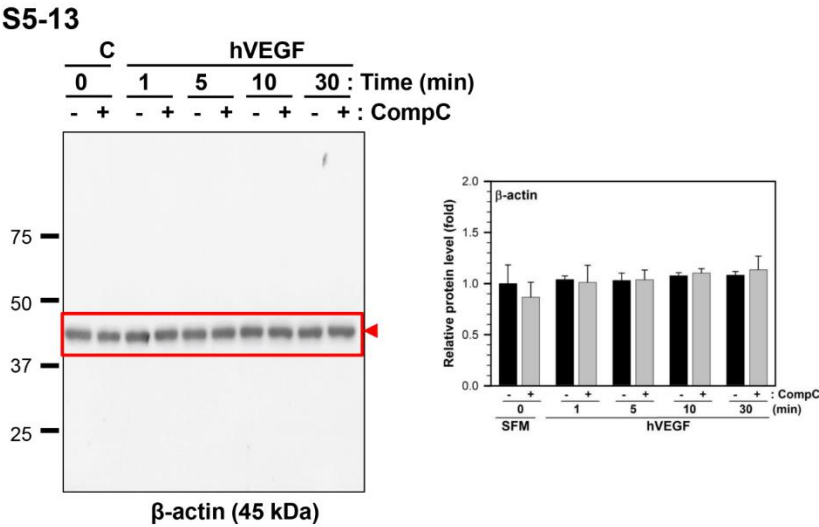

**Figure S5.** HUVECs were serum-starved by incubation with EBM for 24 h. Cells were treated with EBM containing 50 ng/ml hVEGF for the indicated times in the presence of vehicle (–) or 10 μM CompC (+). Cell lysates were analyzed by western blotting with antibodies against total and phosphorylated hVEGFR and other signaling proteins. The band density of β-actin was used as a normalization control for densitometry analysis of each blot. A representative whole blot and a graph with error bars for western blot analysis of each protein are shown side by side. (supplementary data for Figure 4F)

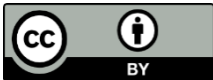

© 2019 by the authors. Licensee MDPI, Basel, Switzerland. This article is an open access article distributed under the terms and conditions of the Creative Commons Attribution (CC BY) license (<http://creativecommons.org/licenses/by/4.0/>).
